# Supplementary material for: Pediatric growth patterns in youth‐onset type 2 diabetes mellitus: Implications for physiologically‐based pharmacokinetic models
Source: PubMed Central journal article supplement — Clin Transl Sci. 2022 Mar 16;15(4):912–22. doi: 10.1111/cts.13207 (PMC9010268; doi:10.1111/cts.13207), 2022-03-16

Supplemental Information 2a: Absolute residuals of data to fit

**Female Height**

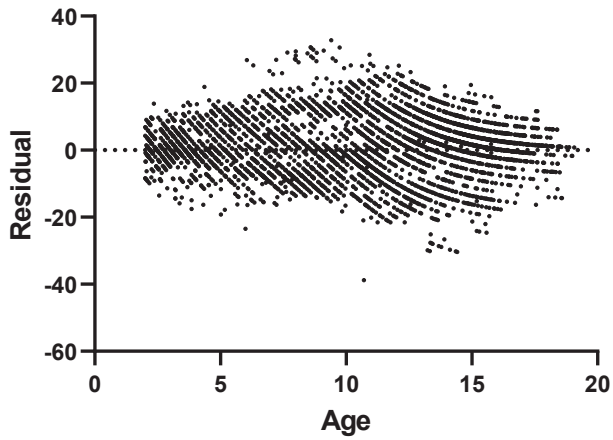

**Male Height**

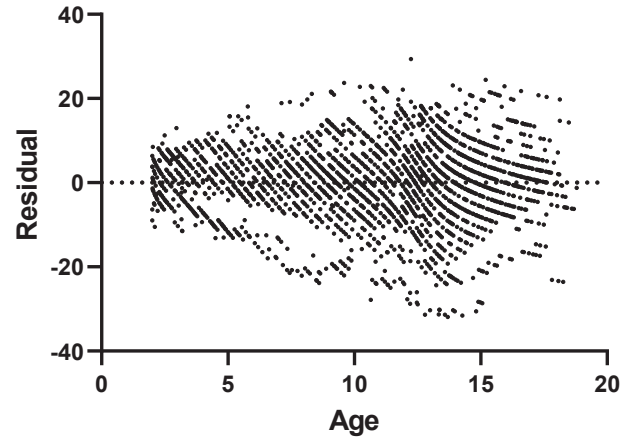

**Female Weight**

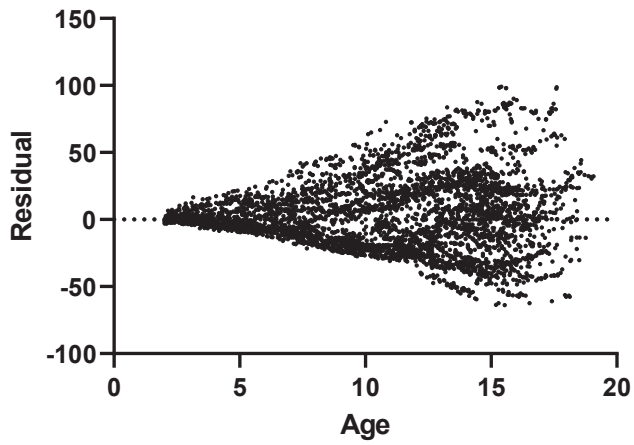

**Male Weight**

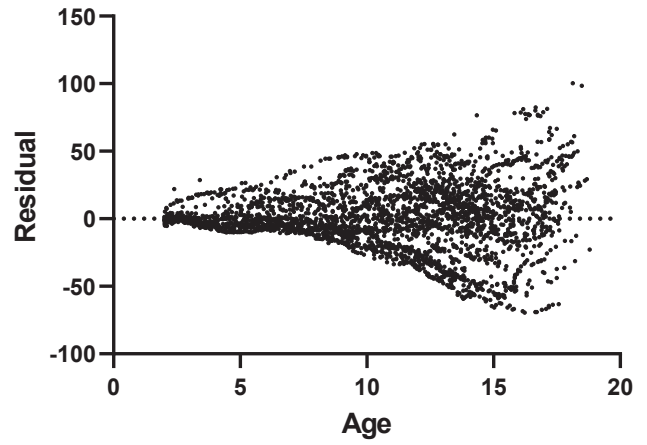

Supplement: CTS-15-912-s001.pdf [file CTS-15-912-s001.pdf]
