# Supplementary material for: Pediatric growth patterns in youth‐onset type 2 diabetes mellitus: Implications for physiologically‐based pharmacokinetic models
Source: PubMed Central journal article supplement — Clin Transl Sci. 2022 Mar 16;15(4):912–22. doi: 10.1111/cts.13207 (PMC9010268; doi:10.1111/cts.13207), 2022-03-16

Supplemental Information 3: Simulated height and weights for females (left panel) and males (right panel) aged 2-18 who develop type 2 diabetes using models and coefficients of variation. Black dots = simulated individuals, grey dots = actual data, blue line = CDC growth model, red line = T2DM growth model.

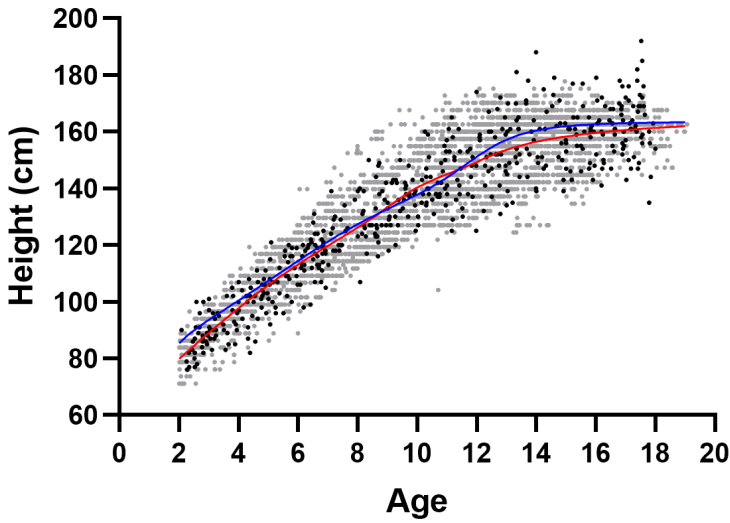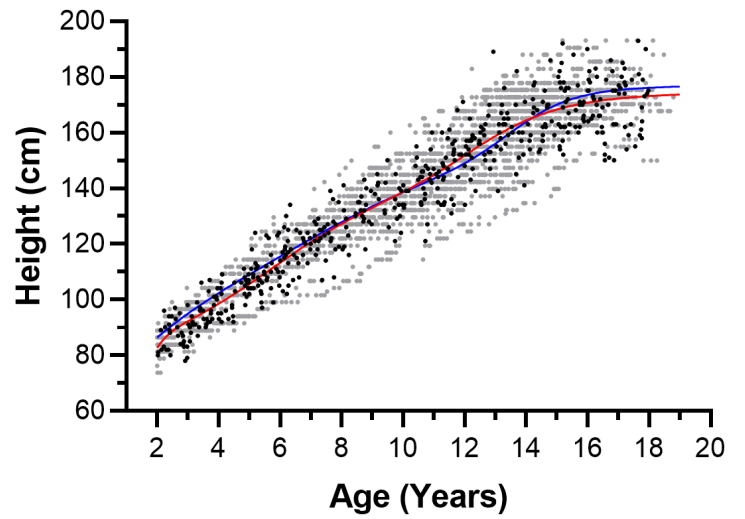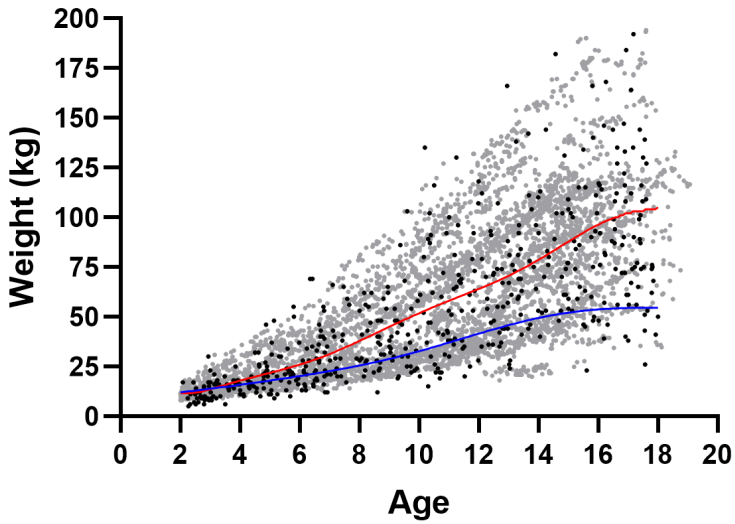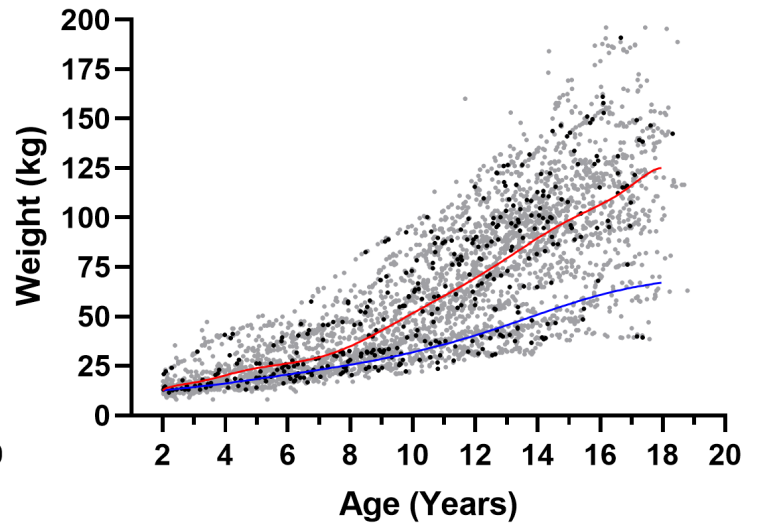

Supplement: CTS-15-912-s004.pdf [file CTS-15-912-s004.pdf]
